# Supplementary figures and images for: Computational investigation of phytochemicals from Allamanda cathartica as a potent agonist of Peroxisome proliferator-activated receptor-gamma (PPARγ) for the treatment of Diabetes mellitus
Source: Research Square preprint supplement (doi:10.21203/rs.3.rs-4214253/v1), 2024-04-09

**Graphical Abstract**


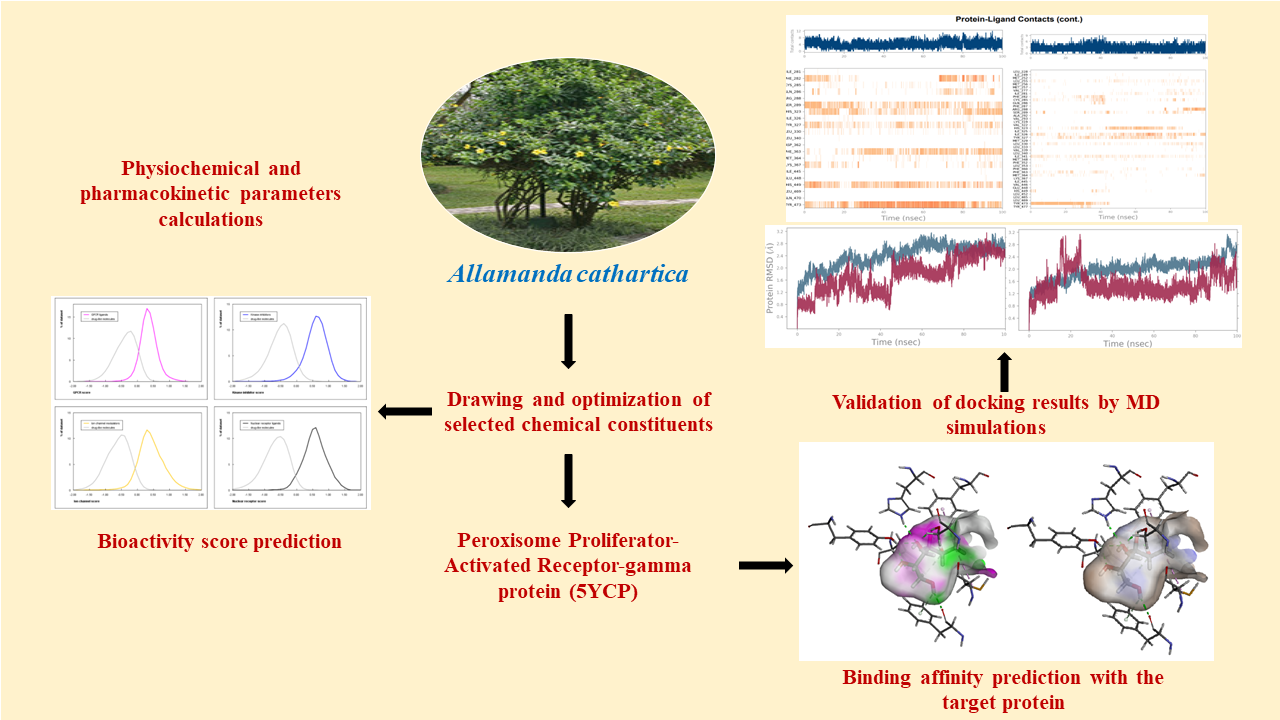

Supplement: Supplementary file 1 [file dd96d5b54c336f540e15c7cb.docx]
